# Supplementary material
Source: PubMed Central journal article supplement (PMC3256865)
Supplement: supp_M111.303149_jbc.M111.303149-1.pdf [file supp_M111.303149_jbc.M111.303149-1.pdf]

## Supplemental Data for

### Human protein disulfide isomerase is a redox-regulated chaperone activated by oxidation of domain a'

Chao Wang, Jiang Yu, Lin Huo, Lei Wang, Wei Feng, and Chih-chen Wang

#### Supplemental Figure S1

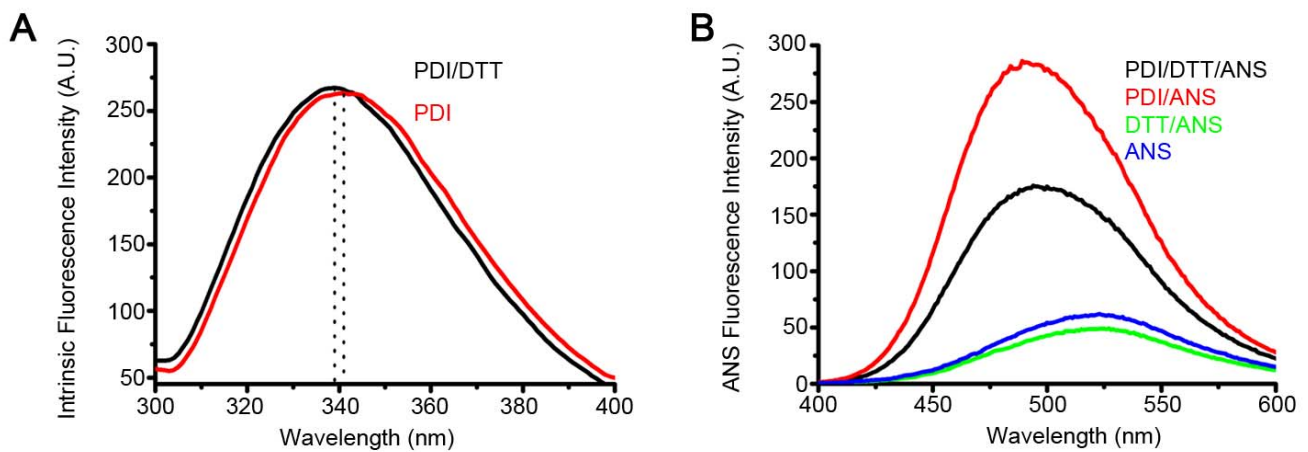

**Figure S1: The intrinsic and ANS fluorescence spectra of hPDI in the absence or presence of DTT.** hPDI at 5  $\mu$ M was incubated without or with 1 mM DTT at 25°C for 30 min. Intrinsic (A) and ANS (B) fluorescence spectra were recorded.

## Supplemental Figure S2

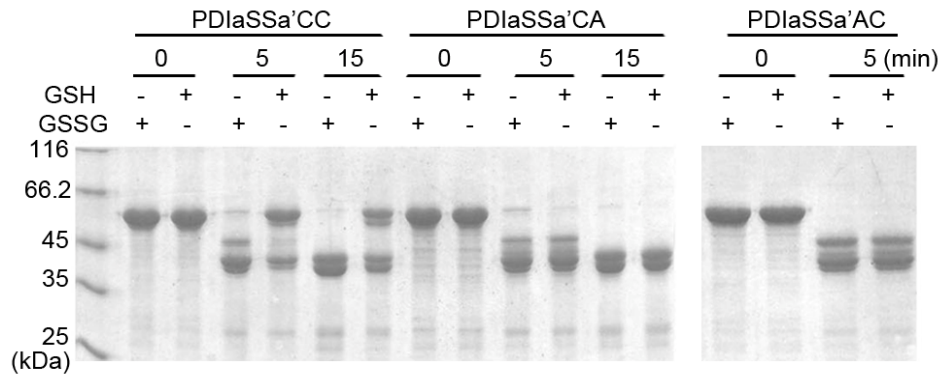

**Figure S2: The integrity of the a' active site is essential for the compact conformation of the reduced hPDI.** hPDI mutants at 1 mg/ml were incubated with 1 mM GSH or GSSG at 25°C for 30 min and then digested by 2 µg/ml proteinase K for different time as indicated. The reactions were terminated by adding PMSF to a final concentration of 0.5 mM, and analyzed by reducing SDS-PAGE.

### Supplemental Figure S3

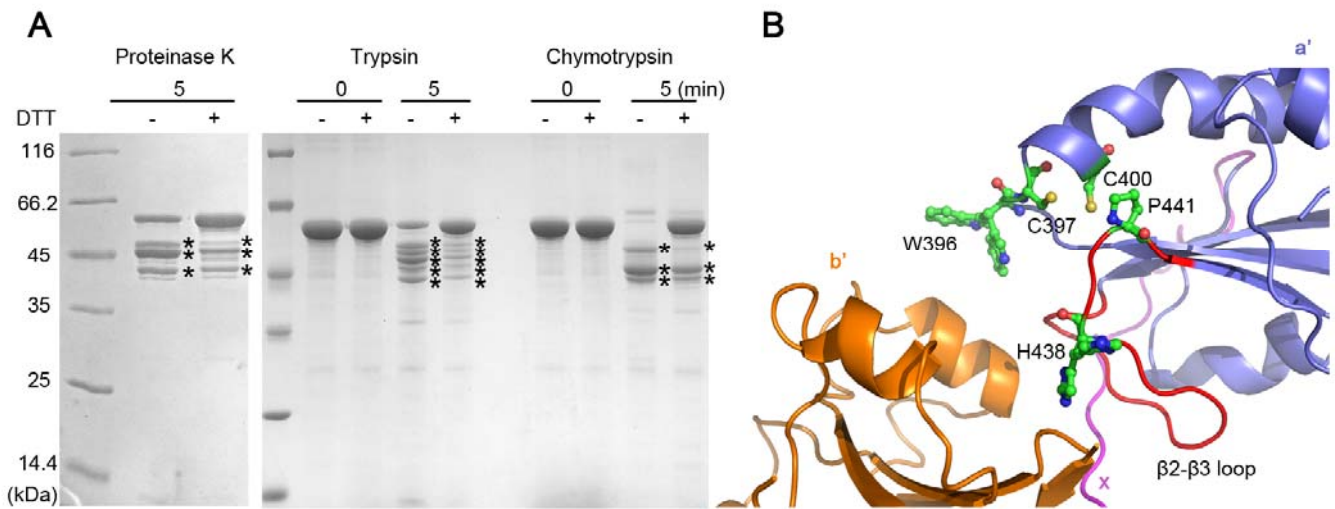

**Figure S3: Mapping the redox sensitive residues in hPDI.** (A) Protease digestion profiles of hPDI at different redox states. hPDI at 1 mg/ml was incubated with or without 1 mM DTT at 25°C for 30 min and then digested by 0.3 μg/ml proteinase K, 2 μg/ml trypsin or chymotrypsin for 5 min. The reactions were terminated by adding PMSF to a final concentration of 0.5 mM, and analyzed by reducing SDS-PAGE. The major products are indicated by asterisks. (B) Hotspots sensing the redox switch of the a' domain active site. The potential critical residues triggering the redox-regulated conformational changes of hPDI are shown in sticks. The b', x and a' domains are colored in orange, magenta and blue, respectively, and the β2-β3 loop is colored in red.

**Supplemental Table S1: Mapping of the digestion sites for oxidized and reduced PDI.**

| Products <sup>a</sup>                  | Actual molecular mass | Observed mass |                      |          |                 |              |                      |
|----------------------------------------|-----------------------|---------------|----------------------|----------|-----------------|--------------|----------------------|
|                                        |                       | Proteinase K  | DTT/<br>Proteinase K | Trypsin  | DTT/<br>Trypsin | Chymotrypsin | DTT/<br>Chymotrypsin |
| Full-length PDI                        | 56692.59              | 56691.52      | 56692.39             | 56694.55 | 56694.23        | 56694.94     | 56694.29             |
| Met <sup>-12</sup> -His <sup>438</sup> | 48892.34              | 48890.82      | 488893.69            | /        | /               | 48891.45     | /                    |
| Met <sup>-12</sup> -Thr <sup>428</sup> | 47815.13              | 47811.15      | /                    | /        | /               | /            | /                    |
| Met <sup>-12</sup> -Asp <sup>426</sup> | 47626.95              | 47622.91      | /                    | /        | /               | /            | /                    |
| Met <sup>-12</sup> -Met <sup>425</sup> | 47511.86              | 47509.48      | 47512.48             | /        | /               | /            | /                    |
| Met <sup>-12</sup> -Lys <sup>424</sup> | 47380.66              | 47378.02      | 47380.73             | 47380.97 | 47381.84        | 47381.13     | /                    |
| Met <sup>-12</sup> -Ala <sup>423</sup> | 47252.49              | 47250.54      | 47253.40             | /        | /               | /            | /                    |
| Met <sup>-12</sup> -Lys <sup>401</sup> | 44716.60              | /             | /                    | 44716.51 | 44717.25        | /            | /                    |
| Met <sup>-12</sup> -Trp <sup>396</sup> | 44187.95              | /             | /                    | /        | /               | 44188.36     | 44189.36             |
| Met <sup>-12</sup> -Ala <sup>394</sup> | 43904.62              | /             | /                    | /        | /               | 43901.03     | /                    |
| Met <sup>-12</sup> -Lys <sup>375</sup> | 41611.10              | /             | /                    | 41611.06 | 41612.65        | /            | /                    |
| Met <sup>-12</sup> -Leu <sup>372</sup> | 41326.74              | 41326.18      | 41327.04             | /        | /               | 41326.99     | 41328.33             |
| Met <sup>-12</sup> -Lys <sup>370</sup> | 41114.45              | /             | /                    | 41115.33 | /               | /            | /                    |

<sup>a</sup> All the products contain a N-terminal (MRGSH<sub>6</sub>GS) tag.
